# Supplementary material
Source: MDPI journal article supplement (https://www.mdpi.com/2227-9717/10/7/1361)
Supplement: s1 [file s1]

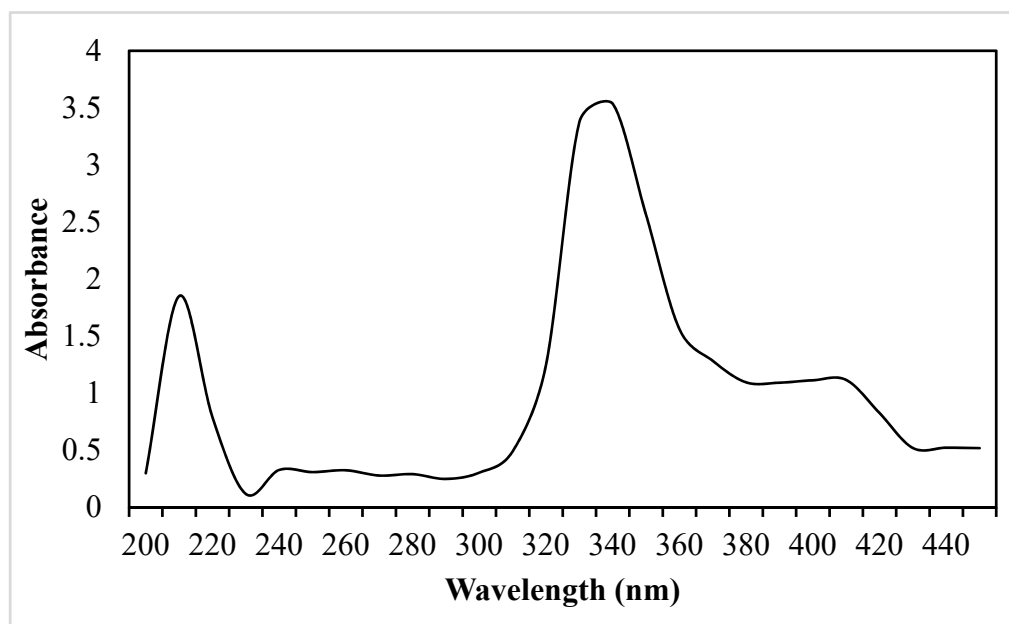

**Figure S1.** UV spectrum of fraction F1.

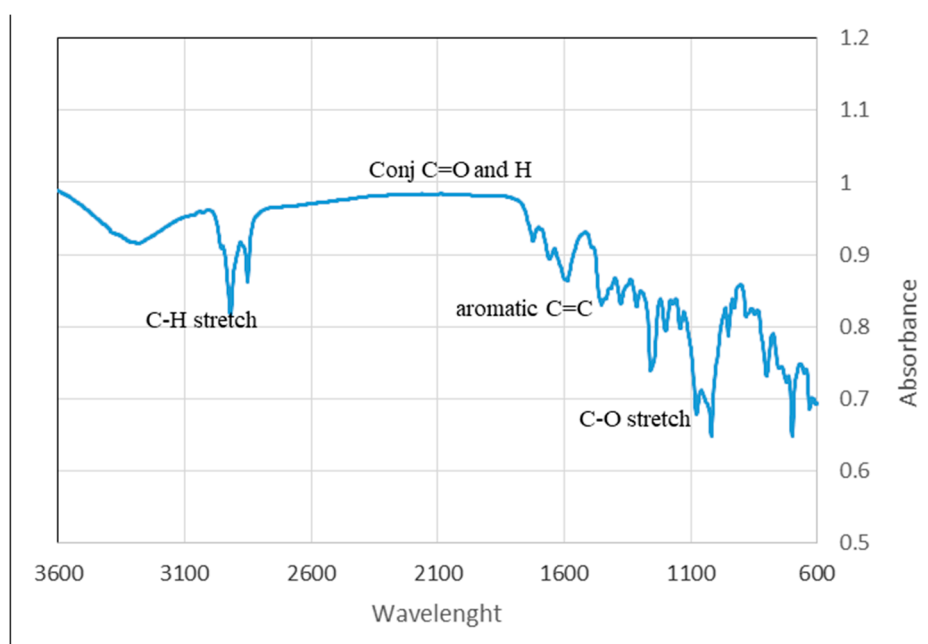

**Figure S2.** IR Spectrum of fraction F1.

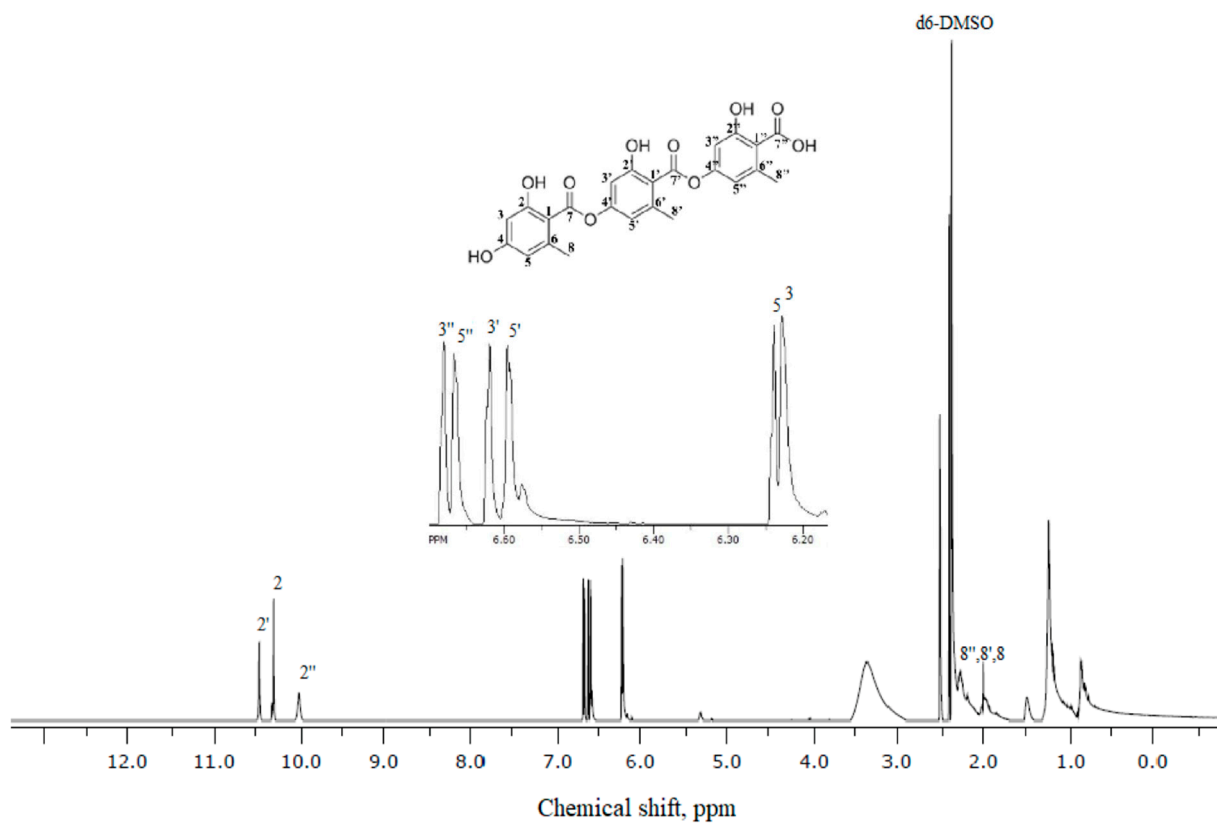

Figure S3.  $^1\text{H}$ -NMR spectrum of fraction F1.

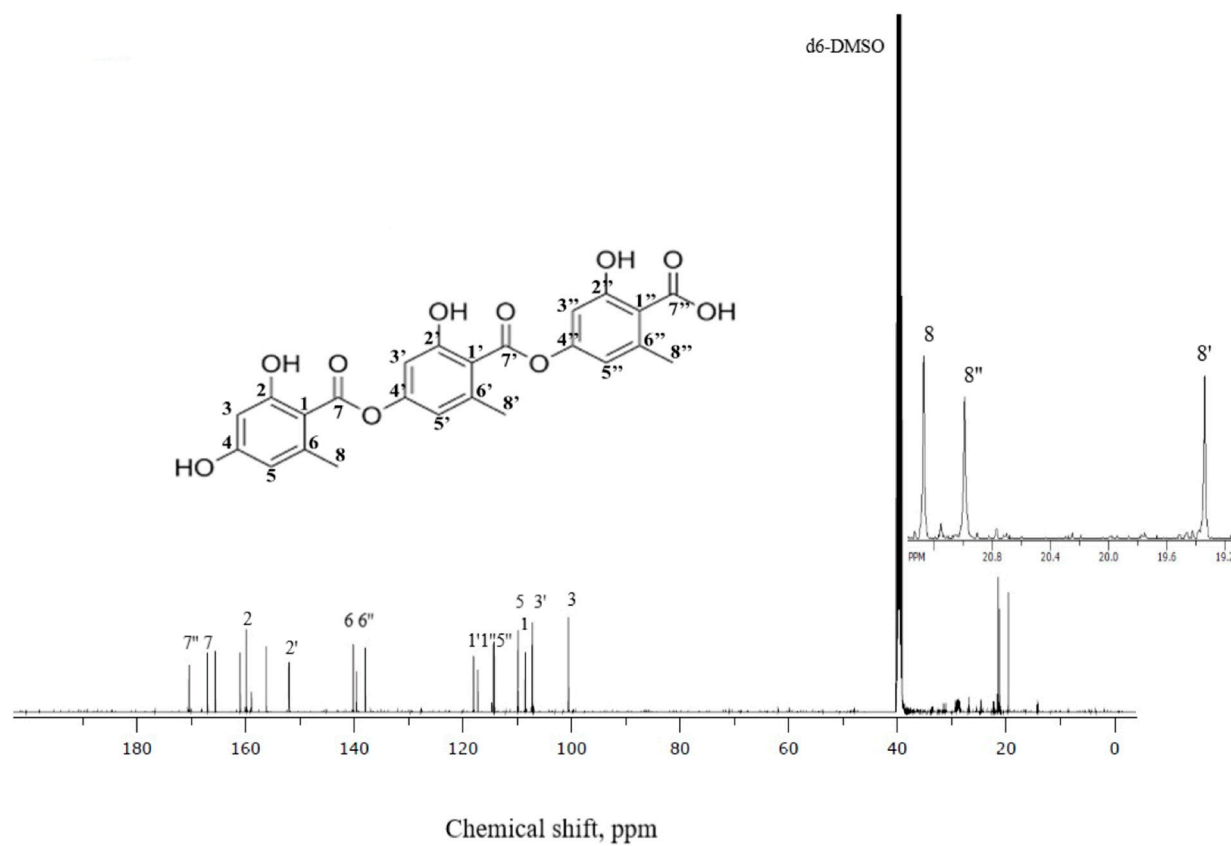

**Figure S4.**  $^{13}\text{C}$ -NMR spectrum of fraction F1.

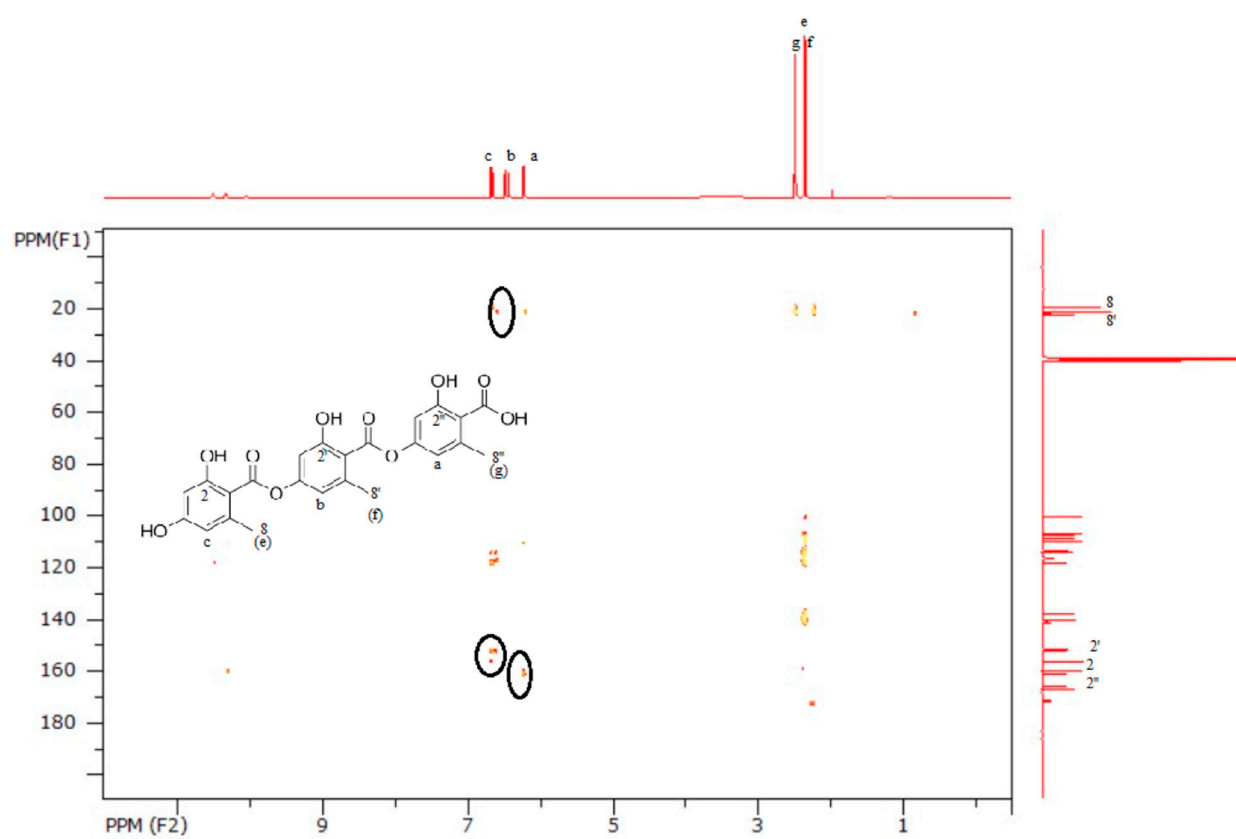

**Figure S5.** Selected HMBC correlations in fraction F1.

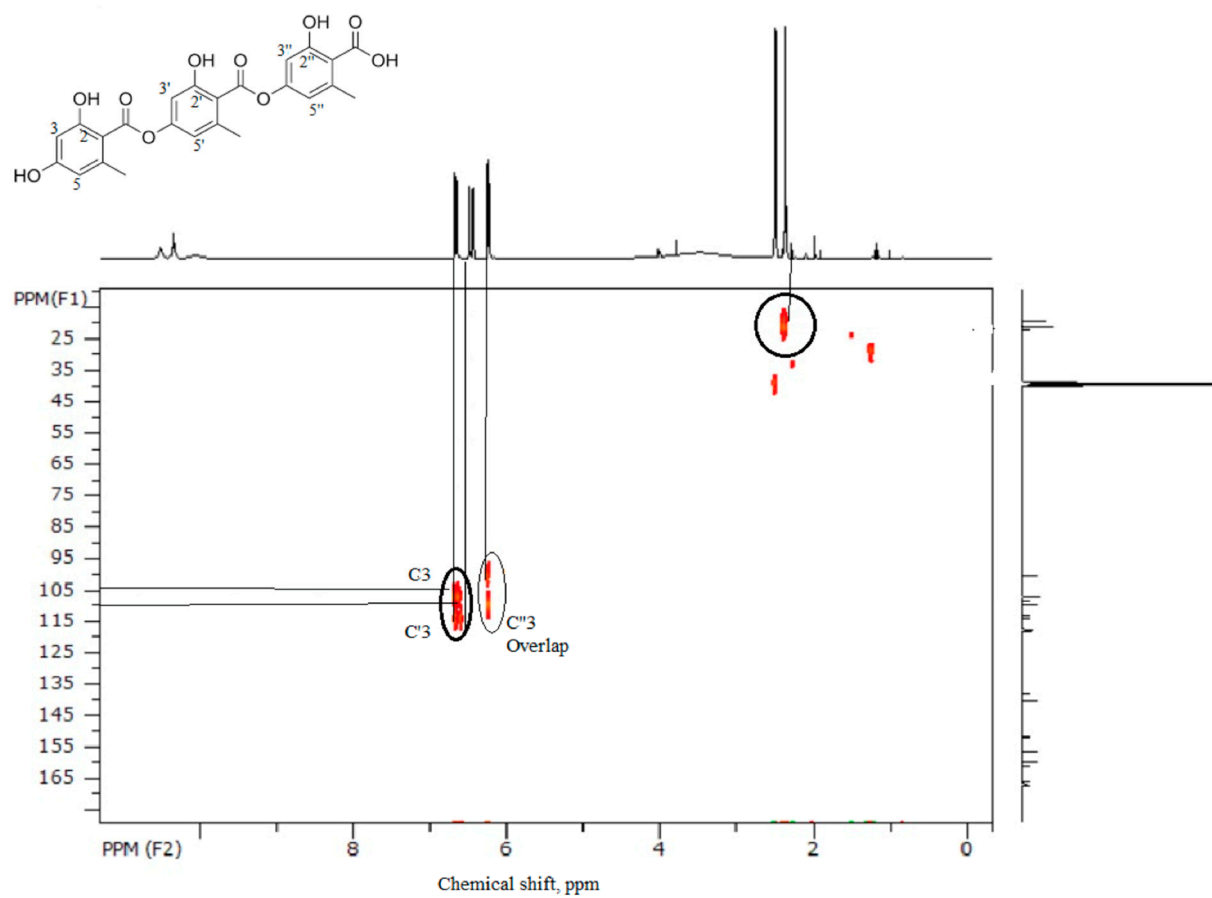

**Figure S6.** HSQC spectrum of fraction F1.
